# Supplementary material
Source: PubMed Central journal article supplement (PMC1765449)

ChIP:

input

 $\alpha$ -P-ser10-H3

Normal 60  
CRC-X8  
CRC-X34  
CRC-X39  
Normal 60  
CRC-X8  
CRC-X34  
CRC-X39

hes1 p

hrt1 p

hes5 p

c-fos p

I $\kappa$ B $\alpha$  p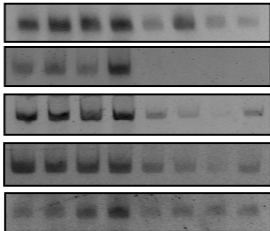

Supplement: pnas_0606476104_4.pdf [file pnas_0606476104_4.pdf]
