# Supplementary material
Source: PubMed Central journal article supplement (PMC1765449)
Supplement: pnas_0606476104_8.pdf [file pnas_0606476104_8.pdf]

## ChiP primer sequences

|       |                                              |                                       |                                      |
|-------|----------------------------------------------|---------------------------------------|--------------------------------------|
| Human | Human hes-1 promoter (product 133 bp)        | 5'-TTCCAGGACCAAGGAGAGAGGTAG -3'       | 5-AGTTTCACACGAGCCGTTTCG-3'           |
| Human | Human hes-5 promoter (product 170 bp)        | 5'-GCT CAG CCC CAA AGA GAA AAA C-3'   | 5'- TGA CAG CCA TCT CCA GGA TGT C-3' |
| Human | Human herp2 promoter (product 174 bp)        | 5'-TCA GTG TGT GCG GAA CGC AA G-3'    | 5'-TTC TTC ACC TCG ATG GTC TCG TC-3' |
| Human | Human clAP-2 promoter (product 205 bp)       | 5'-GTG TGT GTG GTT ATT ACC GC-3'      | 5'-AGC AAG GAC AAG CCC AGT CT-3'     |
| Human | Human cyclin D1 promoter (product 122 bp)    | 5'-TGT GCT GCG AAG TGG AAA CC-3'      | 5'-TTT GAA GTA GGA CAC CGA GGG C -3' |
| Human | Human c-fos promoter (product 180 bp)        | 5'-AGC GAG CAA CTG AGA AGC CAA G-3'   | 5'-AAG CCC GAG AAC ATC ATC GTG G-3'  |
| Human | Human Ikb $\alpha$ promoter (product 128 bp) | 5'-AAA GAC GAG GAG TAC GAG CAG ATG-3' | 5'-AAG TGC AGG AAC GAG TCC CC-3'     |
| Human | Human bcl2 promoter (product 219 bp)         | 5'-GTGTGTATGCCCTGCTTTCACTC-3'         | 5'-ACTTGATTCTGGTGTTCCTCC-3'          |
| Human | Human c-myc promoter (product 195 bp)        | 5'-ATT GTA TTC CTC ACC GCC ACC-3'     | 5'-TTT CAC CCC CTT TGG ACA GTC-3'    |

## RT-PCR primer sequences

|       |                                  |                                          |                                        |
|-------|----------------------------------|------------------------------------------|----------------------------------------|
| Human | Hes1 (product 285 bp)            | 5'-TAC CTC TCT CCT TGG TCC TGG AAC -3'   | 5'-CAG ATG CTG TCT TTG GTT TAT CCG -3' |
| Human | Hes5 (product 437 bp)            | 5'-CCC TGC CGT TTT AGG ACA ATC -3'       | 5'- CAT CCA CCC ACA CAG AGG AAT C-3'   |
| Human | clAP-2 (product 285 bp)          | 5'- CCT GTC TCA GAA AGG AGT CTT GCT C-3' | 5'- GTT TGG AGG AAG GCT GGA GTA AG-3'  |
| Human | b-Actin (product 163 bp)         | 5'-GCA CCA CAC CTT CTA CAA TGA GC -3'    | 5'-TAG CAC AGC CTG GAT AGC AAC G -3'   |
| Human | b2 Microglobulin (product 73 bp) | 5'-CCC ACT GAA AAA GAT GAG-3'            | 5'-CCT CCA TGA TGC TGC TT-3'           |
