# Supplementary material
Source: PubMed Central journal article supplement (PMC1765449)

**A**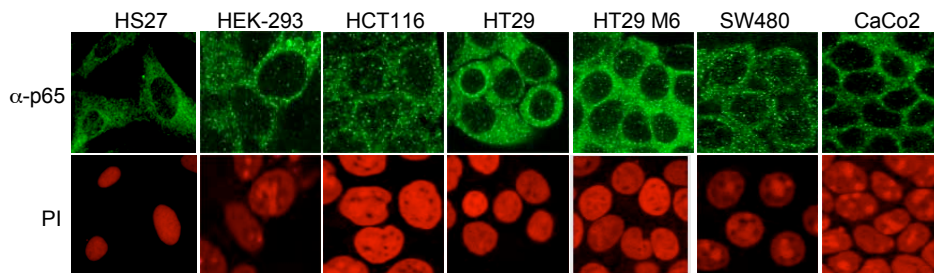**B**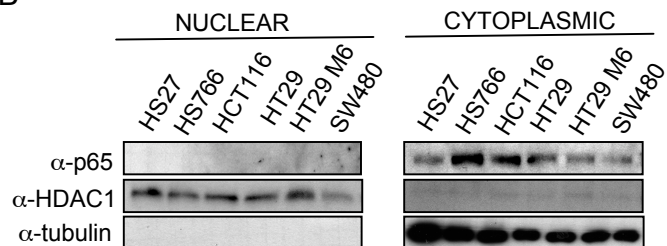**C**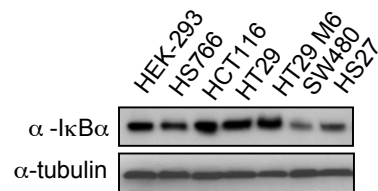**D**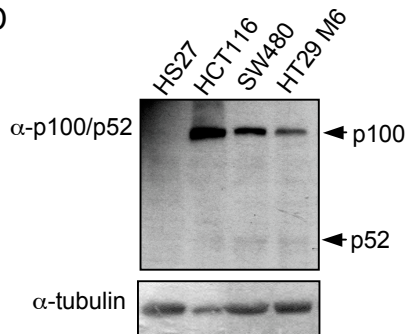

Supplement: pnas_0606476104_1.pdf [file pnas_0606476104_1.pdf]

A

 $\alpha$ -p65 $\alpha$ -p52 $\alpha$ -p50

B9705554

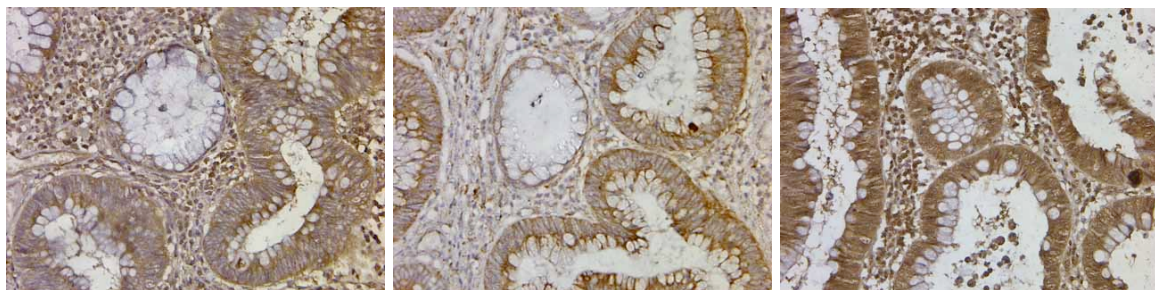

B

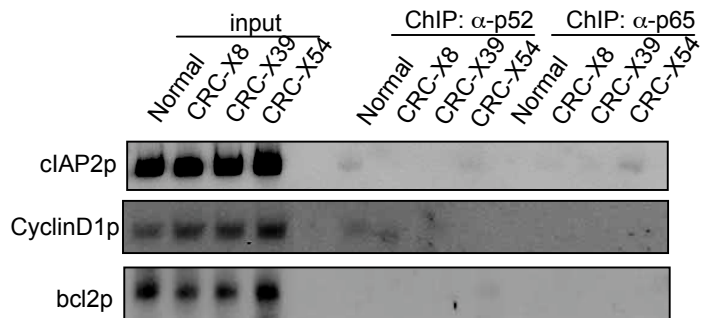

C

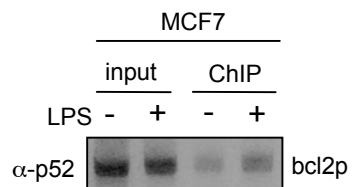

Supplement: pnas_0606476104_2.pdf [file pnas_0606476104_2.pdf]

A

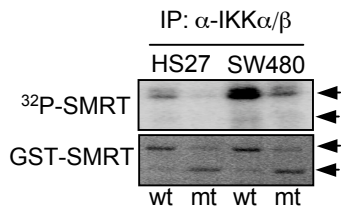

B

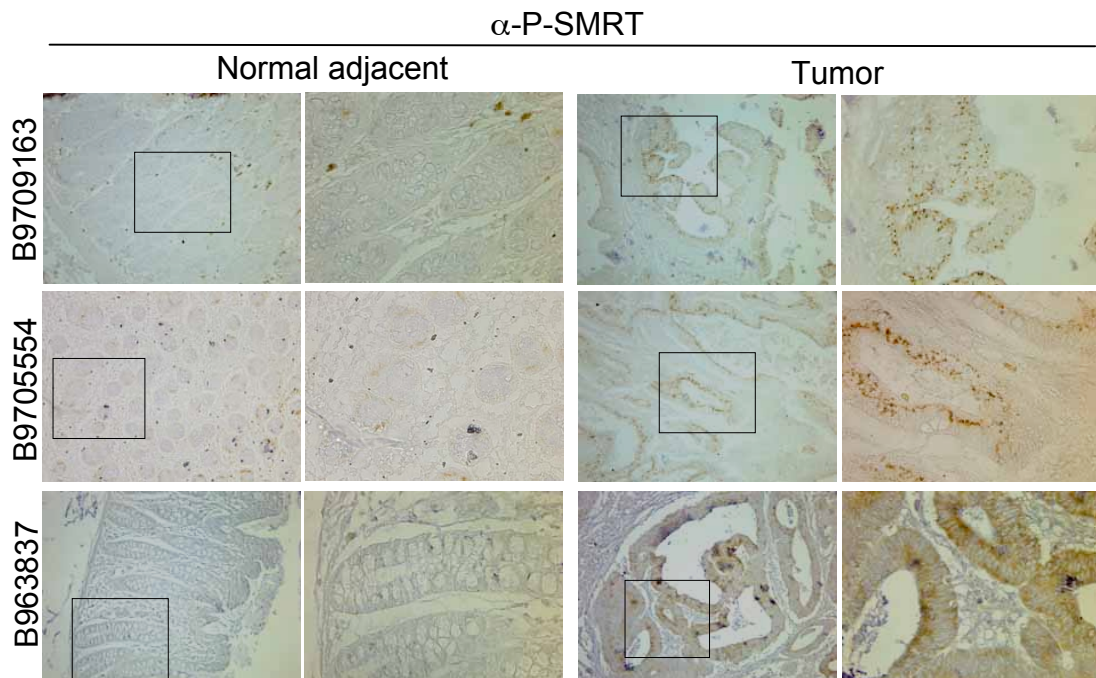

Supplement: pnas_0606476104_3.pdf [file pnas_0606476104_3.pdf]

A

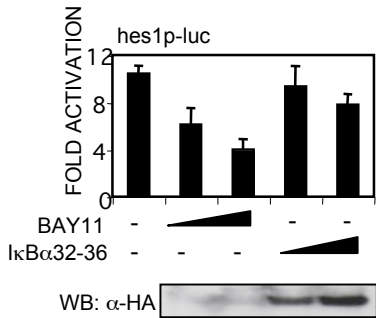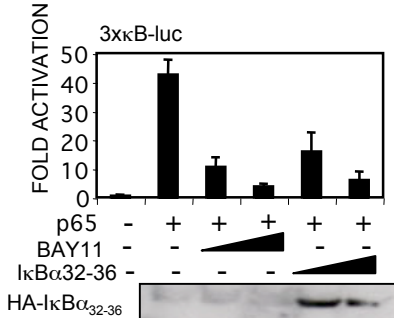

B

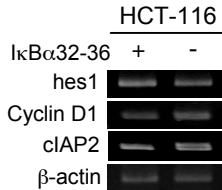

Supplement: pnas_0606476104_5.pdf [file pnas_0606476104_5.pdf]

RT-PCR

ChIP:  $\alpha$ -SMRT

hes1  
 $\beta$ -actin

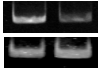

IKK $\alpha$ DN

-

+

hes1p

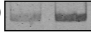

input

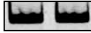

HCT-116

Supplement: pnas_0606476104_6.pdf [file pnas_0606476104_6.pdf]

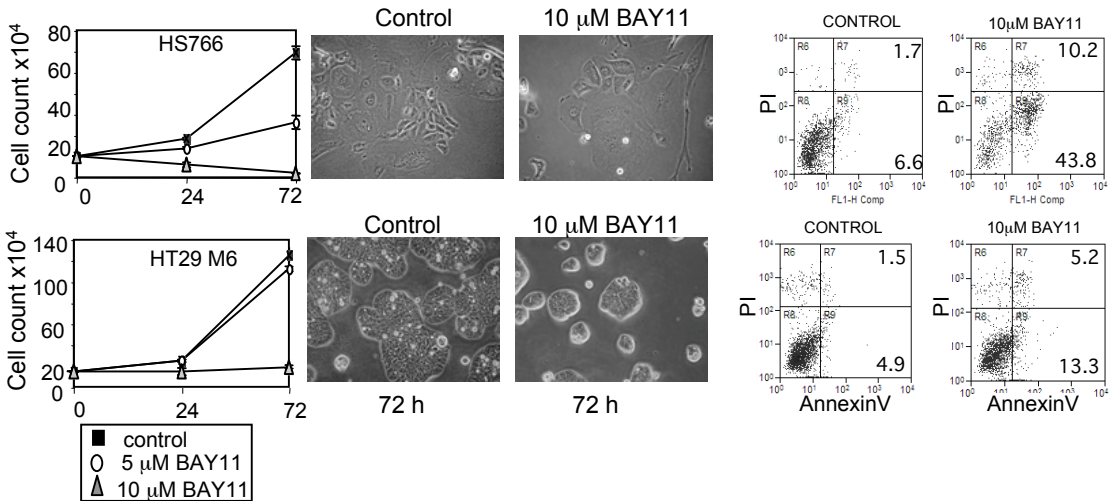

Supplement: pnas_0606476104_7.pdf [file pnas_0606476104_7.pdf]
